# Supplementary material
Source: publisher figshare collection journal article supplement (https://acs.figshare.com/ndownloader/files/13389077)
Supplement: Supplementary file 1 [file 13389077]

## Sheet: 工作表1
Gene name	Protein Descriptions	Biological replicate 1	Biological replicate 2	Biological replicate 3	Average protein fold change of three replicates	S.D. protein fold change of three replicates	Repression fold (miR-197mimic/Lipo, log2)	Total sites	8mer sites	7mer-m8 sites	7mer-A1 sites	6mer sites	Targetscan prediction sites (context scores)
ACACA	acetyl-CoA carboxylase alpha	1.3234	1.3842	1.2162	1.30793	0.0850612	-0.387289	1	1	0	0	1	-0.03
ACTN4	actinin, alpha 4	1.3883	1.3365	1.3764	1.36707	0.027132	-0.451084	1*	0	0	0	1	0
ACTR1A	ARP1 actin-related protein 1 homolog A, centractin alpha (yeast)	1.2439	1.2906	1.2196	1.25137	0.0360841	-0.323505	2	0	2	0	2	-0.15
ADH5	alcohol dehydrogenase 5 (class III), chi polypeptide	1.2485	1.3363	1.1826	1.2558	0.0771096	-0.328607	1	0	0	1	1	-0.09
ANP32E	acidic (leucine-rich) nuclear phosphoprotein 32 family, member E	1.1357	1.3724	1.2595	1.25587	0.118392	-0.328683	1	0	1	0	0	-0.31
ANXA7	annexin A7	1.4308	1.091	1.6616	1.39447	0.28703	-0.479713	1	1	0	0	0	-0.34
ARHGAP18	Rho GTPase activating protein 18	1.6324	1.5134	1.4893	1.54503	0.0766153	-0.627638	1	0	1	0	1	-0.17
ARPC1A	actin related protein 2/3 complex, subunit 1A, 41kDa	1.3609	1.3659	1.2837	1.33683	0.0460827	-0.41882	1	0	0	1	0	-0.19
ARPC2	actin related protein 2/3 complex, subunit 2, 34kDa	1.3596	1.2814	1.485	1.37533	0.102708	-0.459781	1	0	0	1	0	-0.04
ATIC	5-aminoimidazole-4-carboxamide ribonucleotide formyltransferase/IMP cyclohydrolase	1.2614	1.2572	1.2503	1.2563	0.00560446	-0.329181	1	0	1	0	0	-0.21
ATP6V1A	ATPase, H+ transporting, lysosomal 70kDa, V1 subunit A	1.6392	1.6994	1.5626	1.63373	0.0685636	-0.708173	1	1	0	0	0	-0.4
C10orf118	chromosome 10 open reading frame 118	1.9811	1.8719	1.5417	1.79823	0.228775	-0.84658	1	0	0	1	1	-0.04
CACYBP	calcyclin binding protein	1.3784	1.3676	1.2562	1.33407	0.0676504	-0.415831	1	0	0	1	1	-0.12
CALU	calumenin	1.339	1.1767	1.2351	1.25027	0.0822061	-0.322236	1	0	0	1	0	-0.01
CCDC88A	coiled-coil domain containing 88A	1.2635	1.3434	1.4574	1.35477	0.0974485	-0.438044	2	1	1	0	0	-0.3
CCT6A	chaperonin containing TCP1, subunit 6A (zeta 1)	1.2608	1.2487	1.3029	1.2708	0.0284501	-0.345737	1	0	1	0	0	-0.24
CDK6	cyclin-dependent kinase 6	1.373	1.4221	1.2958	1.36363	0.0636689	-0.447456	2	1	0	1	0	-0.06
CFDP1	craniofacial development protein 1	1.2057	1.3752	1.3647	1.3152	0.094975	-0.395282	1	0	0	1	0	-0.02
COTL1	coactosin-like 1 (Dictyostelium)	1.2798	1.3449	1.2757	1.30013	0.0388232	-0.37866	1	0	1	0	0	-0.14
CSDE1	cold shock domain containing E1, RNA-binding	1.2374	1.3158	1.2733	1.2755	0.0392463	-0.351063	1	0	0	1	0	-0.01
DENR	density-regulated protein	1.2319	1.4083	1.2212	1.28713	0.10507	-0.364162	3	0	0	3	0	-0.18
DFFA	DNA fragmentation factor, 45kDa, alpha polypeptide	1.5747	1.275	1.5139	1.45453	0.158425	-0.540556	3	1	0	2	2	-0.53
DICER1	dicer 1, ribonuclease type III	1.3132	1.5275	1.225	1.35523	0.155569	-0.438541	1	0	0	1	0	-0.01
DPP3	dipeptidyl-peptidase 3	1.3348	1.4045	1.2707	1.33667	0.0669195	-0.41864	1	0	1	0	0	-0.12
DSTN	destrin (actin depolymerizing factor)	1.2886	2.5039	1.2679	1.6868	0.707705	-0.754289	1	0	0	1	0	-0.04
DYNC1I2	dynein, cytoplasmic 1, intermediate chain 2	1.2814	1.3472	1.2606	1.2964	0.0452066	-0.374511	1	0	0	1	0	-0.03
EDC3	enhancer of mRNA decapping 3	1.1878	1.4343	1.1668	1.26297	0.14875	-0.336817	1	1	0	0	0	-0.12
EIF2AK2	eukaryotic translation initiation factor 2-alpha kinase 2	1.2632	1.3182	1.194	1.25847	0.0622351	-0.331667	2	0	0	2	3	-0.02
EIF5A	eukaryotic translation initiation factor 5A	1.2716	2.0091	1.1587	1.4798	0.46185	-0.565402	1	0	0	1	0	-0.08
ENSA	endosulfine alpha	1.2494	1.2882	1.2987	1.27877	0.0259685	-0.354753	1	0	0	1	0	-0.03
ETF1	eukaryotic translation termination factor 1	1.3481	1.4517	1.4022	1.40067	0.051817	-0.486114	3	1	1	1	0	-0.59
EXOC5	exocyst complex component 5	1.1382	1.3685	1.2697	1.2588	0.115536	-0.332049	1	0	0	1	1	-0.01
FBXL18	F-box and leucine-rich repeat protein 18	1.4049	1.2916	1.2913	1.32927	0.0655006	-0.410631	2	0	0	2	0	-0.08
FKBP5	FK506 binding protein 5	1.3516	1.4673	1.4086	1.40917	0.0578521	-0.494842	1	0	0	1	2	-0.08
FLNB	filamin B, beta	1.2917	1.4245	1.3165	1.34423	0.0706103	-0.426784	1	0	0	1	1	-0.01
GALNT2	UDP-N-acetyl-alpha-D-galactosamine:polypeptide N-acetylgalactosaminyltransferase 2 (GalNAc-T2)	1.3809	1.3304	1.3865	1.36593	0.0308999	-0.449887	1	0	0	1	2	-0.05
GFPT1	glutamine--fructose-6-phosphate transaminase 1	1.2873	1.283	1.341	1.30377	0.0323166	-0.382686	2	0	0	2	3	-0.04
GLG1	golgi glycoprotein 1	1.2452	1.2997	1.2062	1.25037	0.0469636	-0.322351	2	0	1	1	2	-0.03
GLO1	glyoxalase I	1.4875	1.2572	1.2225	1.3224	0.14403	-0.403159	1	0	1	0	1	-0.21
GMPS	guanine monphosphate synthase	1.2013	1.3273	1.2387	1.25577	0.0647105	-0.328568	2	0	0	2	0	-0.02
GRB2	growth factor receptor-bound protein 2	1.3362	1.358	1.3344	1.34287	0.0131367	-0.425316	2	0	1	1	1	-0.36
GSR	glutathione reductase	1.3498	1.5621	1.3164	1.40943	0.133264	-0.495115	4	0	1	3	1	-0.49
HBS1L	HBS1-like (S. cerevisiae)	1.3764	1.5284	1.5067	1.4705	0.0822121	-0.556307	2	0	2	0	0	-0.45
HERC4	HECT and RLD domain containing E3 ubiquitin protein ligase 4	1.2453	1.3324	1.3249	1.30087	0.048268	-0.379473	1	0	1	0	0	-0.3
HSPA1A	heat shock 70kDa protein 1A	1.5568	1.6289	1.5007	1.56213	0.0642662	-0.643518	1	0	0	1	0	-0.17
ISOC1	isochorismatase domain containing 1	1.3013	1.2762	1.2109	1.2628	0.0466659	-0.336626	1	0	0	1	0	-0.06
ITGAV	integrin, alpha V	1.6626	1.4735	1.6799	1.60533	0.114498	-0.682873	1	1	0	0	0	-0.17
IWS1	IWS1 homolog (S. cerevisiae)	1.2606	5.6034	5.4774	4.1138	2.47175	-2.04047	1	0	0	1	0	-0.01
KPNA6	karyopherin alpha 6 (importin alpha 7)	1.3989	1.578	1.5721	1.51633	0.101743	-0.600587	2	0	1	1	4	-0.19
LDHA	lactate dehydrogenase A	1.1686	1.5067	1.2112	1.2955	0.184141	-0.373509	1	0	0	1	0	-0.04
MAP2K1	mitogen-activated protein kinase kinase 1	2.0522	1.8591	1.9268	1.94603	0.0979762	-0.960536	2	0	1	1	1	-0.3
MPHOSPH8	M-phase phosphoprotein 8	1.3005	1.1376	2.1715	1.53653	0.555897	-0.619679	1	0	0	1	0	-0.01
MYH9	myosin, heavy chain 9, non-muscle	1.3297	1.3031	1.2715	1.30143	0.0291358	-0.380101	2	0	1	1	0	-0.03
MYO6	myosin VI	1.6028	1.1892	1.3624	1.3848	0.207708	-0.469678	2	0	0	2	0	-0.07
NAP1L4	nucleosome assembly protein 1-like 4	1.3244	1.4665	1.2697	1.35353	0.101583	-0.43673	1	1	0	0	1	-0.54
NARS	asparaginyl-tRNA synthetase	1.325	1.2751	1.3281	1.3094	0.0297451	-0.388906	1	0	1	0	1	-0.07
NME1	NME/NM23 nucleoside diphosphate kinase 1	1.1251	2.127	1.304	1.5187	0.534343	-0.602837	1	1	0	0	0	-0.48
NOLC1	nucleolar and coiled-body phosphoprotein 1	4.4958	1.0954	1.135	2.24207	1.95189	-1.16483	1	0	1	0	0	-0.17
NUCKS1	nuclear casein kinase and cyclin-dependent kinase substrate 1	1.23	1.3199	1.2134	1.25443	0.0573001	-0.327036	2	0	1	1	1	-0.14
OSBPL3	oxysterol binding protein-like 3	1.3325	1.4866	1.2446	1.35457	0.1225	-0.437831	1	0	0	1	1	-0.01
OTUB1	OTU domain, ubiquitin aldehyde binding 1	1.282	1.4384	1.2998	1.34007	0.085623	-0.422305	1	0	1	0	0	-0.09
P4HA1	prolyl 4-hydroxylase, alpha polypeptide I	1.2677	1.3163	1.2911	1.2917	0.0243056	-0.369271	1	1	0	0	0	-0.33
PAFAH1B1	platelet-activating factor acetylhydrolase 1b, regulatory subunit 1 (45kDa)	1.3407	1.3074	1.368	1.3387	0.0303495	-0.420833	1	0	0	1	0	-0.05
PANK4	pantothenate kinase 4	1.3567	1.4612	1.368	1.3953	0.0573501	-0.480575	1	0	1	0	2	-0.09
PARVA	parvin, alpha	1.3047	1.2339	1.3081	1.28223	0.0418924	-0.358659	3	0	0	3	0	-0.21
PDIA3	protein disulfide isomerase family A, member 3	1.2882	1.182	1.2836	1.25127	0.0600308	-0.323389	1	0	0	1	1	-0.01
PEA15	phosphoprotein enriched in astrocytes 15	1.2555	1.367	1.495	1.3725	0.119845	-0.456806	1	0	0	1	0	-0.01
PEX19	peroxisomal biogenesis factor 19	1.3365	1.3983	1.3013	1.34537	0.0491041	-0.427999	1	0	0	1	1	-0.13
PGAM1	phosphoglycerate mutase 1 (brain)	1.1885	1.4383	1.1874	1.2714	0.144541	-0.346418	1	0	1	0	1	-0.22
PGK1	phosphoglycerate kinase 1	1.2493	1.3576	1.2565	1.2878	0.0605557	-0.364909	1	0	0	1	0	-0.05
PHKB	phosphorylase kinase, beta	1.3049	1.4437	1.5618	1.4368	0.128589	-0.522859	2	0	0	2	0	-0.11
PIK3C2A	phosphatidylinositol-4-phosphate 3-kinase, catalytic subunit type 2 alpha	1.3207	1.2175	1.2393	1.25917	0.0543928	-0.332469	1	0	0	1	1	-0.01
PITPNB	phosphatidylinositol transfer protein, beta	1.4339	1.6492	1.4688	1.5173	0.115554	-0.601506	1	1	0	0	0	-0.38
PLCG1	phospholipase C, gamma 1	1.3625	1.4567	1.2936	1.37093	0.0818764	-0.455158	2	0	2	0	2	-0.09
PLIN3	perilipin 3	1.2686	1.2946	1.3462	1.30313	0.0394975	-0.381985	1	0	0	1	0	-0.05
PPP6C	protein phosphatase 6, catalytic subunit	1.2898	1.4635	1.3969	1.3834	0.0876334	-0.468218	2	0	0	2	0	-0.05
PRKCI	protein kinase C, iota	1.2741	1.2508	1.2988	1.27457	0.0240034	-0.350007	1	0	0	1	0	-0.06
PSMB2	proteasome (prosome, macropain) subunit, beta type, 2	1.2037	1.3485	1.261	1.27107	0.072923	-0.34604	1	0	0	1	0	-0.07
PSME4	proteasome (prosome, macropain) activator subunit 4	1.2336	1.3162	1.2474	1.26573	0.0442467	-0.339973	2	0	0	2	0	-0.19
QPRT	quinolinate phosphoribosyltransferase	1.4446	1.5087	1.4552	1.4695	0.0343594	-0.555325	1	0	0	1	1	-0.08
RALB	v-ral simian leukemia viral oncogene homolog B	1.8036	1.541	1.8359	1.72683	0.161745	-0.788129	1	1	0	0	0	-0.27
RAN	RAN, member RAS oncogene family	1.4112	1.5244	1.3715	1.4357	0.0793397	-0.521754	2	1	0	1	0	-0.56
RNF213	ring finger protein 213	1.4517	1.3731	1.1671	1.33063	0.146976	-0.412113	1	0	1	0	0	-0.02
RWDD1	RWD domain containing 1	1.3408	1.4203	1.2523	1.3378	0.0840402	-0.419862	2	0	1	1	1	-0.32
SCRN1	secernin 1	1.3654	1.3447	1.3377	1.34927	0.0144036	-0.432176	1	0	0	1	0	-0.01
SEPHS1	selenophosphate synthetase 1	1.2458	1.2856	1.2491	1.26017	0.0220876	-0.333615	2	0	0	2	0	-0.05
SLK	STE20-like kinase	1.2266	1.3235	1.3012	1.28377	0.0507478	-0.360383	1	0	0	1	1	-0.01
SPAG9	sperm associated antigen 9	1.4125	1.2501	1.3153	1.32597	0.0817238	-0.407045	1	0	0	1	1	-0.02
STRN3	striatin, calmodulin binding protein 3	1.2938	1.3076	1.2141	1.27183	0.0504724	-0.34691	1	0	0	1	0	-0.01
SYAP1	synapse associated protein 1	1.3236	1.3756	1.3333	1.34417	0.0276507	-0.426712	1	0	0	1	0	-0.12
TBCA	tubulin folding cofactor A	1.2594	1.3765	1.2584	1.2981	0.0678982	-0.376402	1	0	0	1	0	-0.1
TGOLN2	trans-golgi network protein 2	1.3469	1.2532	1.2606	1.2869	0.0520931	-0.3639	2	1	0	1	3	-0.04
TMOD3	tropomodulin 3 (ubiquitous)	1.348	1.3495	1.5382	1.4119	0.109382	-0.497638	1	0	0	1	1	-0.05
TPD52	tumor protein D52	1.2542	1.2783	1.2922	1.2749	0.0192268	-0.350384	2	0	1	1	1	-0.2
TPT1	tumor protein, translationally-controlled 1	1.2272	1.4827	1.2978	1.3359	0.131942	-0.417812	1	0	0	1	1	-0.11
TXNDC5	thioredoxin domain containing 5 (endoplasmic reticulum)	1.2412	1.2927	1.2893	1.2744	0.0288023	-0.349818	1	0	0	1	0	-0.07
TXNRD1	thioredoxin reductase 1	1.4526	1.4979	1.3537	1.43473	0.0737416	-0.520783	1	0	0	1	0	-0.1
TYMS	thymidylate synthetase	1.4743	1.6752	1.3554	1.50163	0.161643	-0.586533	1	0	0	1	0	-0.21
UBA2	ubiquitin-like modifier activating enzyme 2	1.235	1.3539	1.1677	1.2522	0.0942841	-0.324465	2	0	1	1	0	-0.14
UCHL1	ubiquitin carboxyl-terminal esterase L1 (ubiquitin thiolesterase)	1.3624	1.3171	1.3832	1.35423	0.0337983	-0.437476	1	0	0	1	0	-0.11
UCHL5	ubiquitin carboxyl-terminal hydrolase L5	1.2482	1.3532	1.2241	1.27517	0.0686448	-0.350686	1	0	1	0	2	-0.2
USP14	ubiquitin specific peptidase 14 (tRNA-guanine transglycosylase)	1.295	1.3011	1.2015	1.26587	0.0558265	-0.340125	1	0	0	1	0	-0.05
VAT1	vesicle amine transport 1	1.2753	1.2781	1.2756	1.27633	0.00153731	-0.352005	1	0	1	0	0	-0.11
VTA1	vesicle (multivesicular body) trafficking 1	1.2966	1.3045	1.1924	1.2645	0.0625652	-0.338567	1	0	0	1	1	-0.01
YWHAG	tyrosine 3-monooxygenase/tryptophan 5-monooxygenase activation protein, gamma polypeptide	1.2217	1.3218	1.2367	1.26007	0.0539861	-0.3335	1	0	0	1	0	-0.09
ZRANB2	zinc finger, RAN-binding domain containing 2	1.3038	1.7116	1.1752	1.39687	0.280049	-0.482194	1	0	0	1	0	-0.01
* includes non-canonical sites (centered and/or 3' compensatory)
